# Supplementary material for: Genotype and ripening method affect carotenoid content and bio-accessibility in banana
Source: Royal Society of Chemistry journal article supplement (doi:10.1039/d3fo04632j), 2024-01-01
Supplement: d3fo04632j7.xlsx [file d3fo04632j7.xlsx]

## Sheet: Table A.1
Table A.1. Phenotypical characterization of 27 banana accessions at three ripening stages (A, B, C) and two ripening methods at stage C, fully ripened in controlled conditions (Ccc) and fully ripened naturally on the plant (Cnc).
.
Name	Ploidy	Market type	Maturation stage	Length (cm)	Weight (g)	Moisture content (%)
Baby Khai	AA	Dessert	A	11.47	71.29	72
			B		66.95	68
			Ccc		74.66	68
			Ccn		144.02	69
Bluggoe	ABB	Cooking	A	18.9	223.45	69
			B		207.75	69
			Ccc		216.6	67
			Ccn		430.39	69
Bri Bri	unknown	Dessert	A	11.5	56.53	71
			B		58.48	74
			Ccc		58.95	74
			Ccn		110.38	75
Bungai	AA	Dessert	A	15.4	66.37	69
			B		68.73	68
			Ccc		66.75	67
			Ccn		102.06	70
Cavendish	AAA	Dessert	A	23.2	186.23	81
			B		176.63	79
			Ccc		180.76	79
			Ccn		241.76	79
Clon Frances	AAA	Dessert	A	8.3	63.27	68
			B		58.64	69
			Ccc		61.76	72
			Ccn		102.77	74
Ducasse	ABB	Dessert	A	12.17	79.88	71
			B		72.7	73
			Ccc		72.84	69
			Ccn		140.9	69
FHIA18	AAAB	Dessert	A	16.07	157.79	73
			B		145.86	76
			Ccc		160.61	76
			Ccn		253.65	75
Hua Moa	AAB	Plantain	A	19.27	289.58	71
			B		284.43	71
			Ccc		342.56	72
			Ccn		501.62	71
Jaribuaya	AA	Dessert	A	9.9	46.78	68
			B		50.32	69
			Ccc		49.66	70
			Ccn		85.8	69
KKB	AAA	Dessert	A	15.93	118.2	81
			B		123.67	78
			Ccc		120.33	78
			Ccn		260.04	78
Kru	ABB	Dessert	A	15.33	96.81	74
			B		99.95	76
			Ccc		91.82	76
			Ccn		144.07	79
Kunnan	AB	Dessert	A	15.35	119.12	73
			B		122.89	73
			Ccc		125.3	74
			Ccn		156.72	73
Latex Rojo	AAA	Dessert	A	17.5	102.17	76
			B		76.04	75
			Ccc		83.01	75
			Ccn		133.96	75
Manzano	AAB	Cooking	A	14.67	86.22	68
			B		90.56	70
			Ccc		85.61	69
			Ccn		204.46	72
OA511	unknown	Dessert	A	13.27	99.63	69
			B		97	69
			Ccc		88.21	70
			Ccn		205.8	70
P. Awak	ABB	Dessert	A	14.5	112.75	67
			B		98.64	65
			Ccc		109.38	65
			Ccn		214.98	69
P. Keilyn	AAB	Cooking	A	12.97	84.27	65
			B		88.61	64
			Ccc		86.2	66
			Ccn		133.69	68
P. Ceylan	AAB	Cooking	A	17	148.49	72
			B		136.93	75
			Ccc		145.21	74
			Ccn		284.59	73
P. Lidi	AA	Dessert	A	12.17	37.66	69
			B		39.36	71
			Ccc		34.41	74
			Ccn		62.09	68
P. Liling	AA	Dessert	A	11.53	45.71	69
			B		48.19	70
			Ccc		44.18	71
			Ccn		76.51	70
Pitogo	ABB	Plantain	A	6.67	47	67
			B		44.63	66
			Ccc		45.5	67
			Ccn		55.73	68
Prata	AAB	Dessert	A	13	74.33	79
			B		70.67	77
			Ccc		70.52	77
			Ccn		77.81	76
Red Macabu	AAA	Dessert	A	16.9	85.9	72
			B		121.11	73
			Ccc		126.81	74
			Ccn		248.95	77
Selangor	AA	Dessert	A	17.33	122.37	73
			B		113.49	75
			Ccc		112.99	73
			Ccn		176.92	74
ThapMaeo	AAB	Cooking	A	15.67	124	66
			B		131.67	70
			Ccc		133.93	70
			Ccn		266.21	76
Tindok	AAB	Plantain	A	29.67	363.28	63
			B		357.08	63
			Ccc		387.35	64
			Ccn		446.97	64

## Sheet: Table A.2
Table A.2. Total carotenoid content in 27 banana accessions at ripening stage A.
Total carotenoid content at maturation stage A (unripe)
Name	Lutein (mg/100 g dry weight)		Tukey's HSD3	Lutein (mg/100g fresh weight)	α-carotene (mg/100 g dry weight)		Tukey's HSD3	α-carotene (mg/100g fresh weight)	β-carotene (mg/100 g dry weight)		Tukey's HSD3	β-carotene (mg/100g fresh weight)	Total Carotenoids1 (mg/100g dry weight)		Tukey's HSD3	Total Carotenoids1 (mg/100g fresh weight)	Total Carotenoids (RAE)2 (mg/100 g dry weight)		Total Carotenoids (RAE)2 (mg/100 g fresh weight)
Baby Khai	0.377	±0.15	ab	0.10556	0.316	±0.142	bc	0.08848	0.396	±0.184	bc	0.11088	1.163	±0.509	bcd	0.32564	0.0619	± 0.028	0.017332
Bluggoe	0.064	±0.022	ab	0.01984	0.042	±0.017	c	0.01302	0.188	±0.070	bc	0.05828	0.337	±0.126	bcd	0.10447	0.0201	± 0.003	0.006231
Bri Bri	0.144	±0.024	ab	0.04176	0.373	±0.057	abc	0.10817	0.588	±0.157	bc	0.17052	1.241	±0.237	abcd	0.35989	0.0705	± 0.016	0.020445
Bungai	0.146	±0.011	ab	0.04526	0.063	±0.009	c	0.01953	0.264	±0.060	bc	0.08184	0.499	±0.072	bcd	0.15469	0.0307	± 0.002	0.009517
Cavendish	0.126	±0.048	ab	0.02394	0.051	±0.018	c	0.00969	0.035	±0.013	bc	0.00665	0.22	±0.082	bcd	0.0418	0.0103	± 0.008	0.001957
Clon Frances	0.065	±0.028	ab	0.0208	0.016	±0.007	c	0.00512	0.017	±0.006	c	0.00544	0.1	±0.042	cd	0.032	0.0048	± 0.003	0.001536
Ducasse	0.031	±0.021	b	0.00899	0.013	±0.011	c	0.00377	0.043	±0.028	bc	0.01247	0.099	±0.069	d	0.02871	0.0054	± 0.005	0.001566
FHIA18	0.038	±0.031	ab	0.01026	0.01	±0.010	c	0.0027	0.016	±0.014	bc	0.00432	0.07	±0.060	bcd	0.0189	0.0033	± 0.006	0.000891
Hua Moa	0.019	±0.002	b	0.00551	0.346	±0.016	abc	0.10034	0.582	±0.022	ab	0.16878	1.03	±0.047	abc	0.2987	0.0637	± 0.027	0.018473
Jaribuaya	0.128	±0.065	ab	0.04096	0.021	±0.013	c	0.00672	0.027	±0.015	c	0.00864	0.182	±0.097	bcd	0.05824	0.0085	± 0.002	0.00272
KKB	0.088	±0.009	ab	0.01672	0.212	±0.044	bc	0.04028	0.341	±0.065	bc	0.06479	0.716	±0.132	bcd	0.13604	0.0409	± 0.017	0.007771
Kru	0.148	±0.035	ab	0.03848	0.621	±0.162	ab	0.16146	0.591	±0.160	abc	0.15366	1.464	±0.350	ab	0.38064	0.0813	± 0.049	0.021138
Kunnan	0.027	±0.007	ab	0.00729	0.004	±0.002	c	0.00108	0.005	±0.001	c	0.00135	0.043	±0.014	d	0.01161	0.0017	± 0.003	0.000459
Latex Rojo	0.104	±0.048	ab	0.02496	0.191	±0.093	abc	0.04584	0.096	±0.056	bc	0.02304	0.422	±0.208	bcd	0.10128	0.0203	± 0.022	0.004872
Manzano	0.01	±0.003	b	0.0032	0.001	±0.001	c	0.00032	0.007	±0.001	c	0.00224	0.018	±0.002	d	0.00576	0.001	± 0.003	0.00032
OA511	0.02	±0.01	ab	0.0062	0.008	±0.005	c	0.00248	0.013	±0.007	c	0.00403	0.042	±0.021	d	0.01302	0.0023	± 0.011	0.000713
P. Awak	0.077	±0.013	b	0.02541	0.021	±0.005	c	0.00693	0.089	±0.016	c	0.02937	0.207	±0.038	d	0.06831	0.0115	± 0.003	0.003795
P. Keilyn	0.339	±0.048	a	0.11865	0.049	±0.018	c	0.01715	0.047	±0.014	c	0.01645	0.444	±0.077	bcd	0.1554	0.0201	± 0.003	0.007035
P.Ceylan	0.028	±0.014	b	0.00784	0.021	±0.010	c	0.00588	0.043	±0.016	bc	0.01204	0.102	±0.040	bcd	0.02856	0.0056	± 0.007	0.001568
P.Lidi	0.044	±0.006	ab	0.01364	0.004	±0.001	c	0.00124	0.008	±0.001	c	0.00248	0.056	±0.006	cd	0.01736	0.0027	± 0.004	0.000837
P.Liling	0.028	±0.014	ab	0.00868	0.003	±0.002	c	0.00093	0.005	±0.003	c	0.00155	0.037	±0.018	d	0.01147	0.0017	± 0.007	0.000527
Pitogo	0.018	±0.008	b	0.00594	0.08	±0.041	c	0.0264	0.495	±0.238	a	0.16335	0.689	±0.333	abc	0.22737	0.0453	± 0.034	0.014949
Prata	0.098	±0.023	ab	0.02058	0.063	±0.018	c	0.01323	0.073	±0.024	bc	0.01533	0.245	±0.065	bcd	0.05145	0.0128	± 0.012	0.002688
Red Macabu	0.075	±0.042	ab	0.021	0.024	±0.010	c	0.00672	0.018	±0.006	bc	0.00504	0.125	±0.056	bcd	0.035	0.0056	± 0.008	0.001568
Selangor	0.139	±0.069	ab	0.03753	0.04	±0.033	c	0.0108	0.028	±0.022	c	0.00756	0.227	±0.135	cd	0.06129	0.0098	± 0.005	0.002646
ThapMaeo	0.043	±0.006	ab	0.01462	0.014	±0.005	c	0.00476	0.029	±0.006	bc	0.00986	0.092	±0.015	bcd	0.03128	0.0048	± 0.004	0.001632
Tindok	0.03	±0.006	ab	0.0111	0.552	±0.123	a	0.20424	0.773	±0.166	a	0.28601	1.497	±0.303	a	0.55389	0.0887	± 0.074	0.032819
1-Total carotenoid count includes traces amounts of 13-cis-α-carotene and 13-cis-β-carotene (data not shown on the table)
2- Retinol activity equivalent (RAE) in mg/100g D.W.
3- Tukey’s HSD (Honest Significant Difference) grouping

## Sheet: Table A.3
Table A.3. Total carotenoid content of 27 banana accessions at ripening stage B.
Total carotenoid content at maturation stage B (semi-ripe)
Name	Lutein (mg/100 g dry weight)		Tukey's HSD3	Lutein (mg/100g fresh weight)	α-carotene (mg/100 g dry weight)		Tukey's HSD3	α-carotene (mg/100g fresh weight)	β-carotene (mg/100 g dry weight)		Tukey's HSD3	β-carotene (mg/100g fresh weight)	Total Carotenoids1 (mg/100g dry weight)		Tukey's HSD3	Total Carotenoids1 (mg/100g fresh weight)	Total Carotenoids (RAE)2 (mg/100 g dry weight)		Total Carotenoids (RAE)2 (mg/100 g fresh weight)
Baby Khai	0.346	±0.042	a	0.11072	0.343	±0.067	bcde	0.10976	0.497	±0.076	ab	0.15904	1.339	±0.181	abc	0.42848	0.07	± 0.007	0.0224
Bluggoe	0.11	±0.006	b	0.0341	0.038	±0.004	de	0.01178	0.173	±0.009	ab	0.05363	0.357	±0.010	c	0.11067	0.021	± 0.004	0.00651
Bri Bri	0.135	±0.016	b	0.0351	0.447	±0.092	abcd	0.11622	0.691	±0.162	ab	0.17966	1.471	±0.27	abc	0.38246	0.082	± 0.017	0.02132
Bungai	0.086	±0.016	b	0.02752	0.046	±0.007	de	0.01472	0.221	±0.053	ab	0.07072	0.402	±0.063	bc	0.12864	0.024	± 0.009	0.00768
Cavendish	0.242	±0.041	b	0.05082	0.067	±0.009	de	0.01407	0.067	±0.008	b	0.01407	0.391	±0.064	c	0.08211	0.018	± 0.004	0.00378
Clon Frances	0.157	±0.026	b	0.04867	0.039	±0.003	e	0.01209	0.066	±0.005	b	0.02046	0.282	±0.036	c	0.08742	0.014	± 0.001	0.00434
Ducasse	0.072	±0.017	b	0.01944	0.032	±0.018	e	0.00864	0.143	±0.026	b	0.03861	0.283	±0.067	c	0.07641	0.016	± 0.006	0.00432
FHIA18	0.156	±0.005	b	0.03744	0.047	±0.013	de	0.01128	0.095	±0.025	b	0.0228	0.326	±0.048	c	0.07824	0.016	± 0.007	0.00384
Hua Moa	0.083	±0.004	b	0.02407	0.777	±0.053	abcd	0.22533	1.368	±0.099	ab	0.39672	2.398	±0.171	abc	0.69542	0.15	± 0.029	0.0435
Jaribuaya	0.269	±0.068	ab	0.08339	0.029	±0.006	e	0.00899	0.078	±0.026	b	0.02418	0.399	±0.086	c	0.12369	0.019	± 0.007	0.00589
KKB	0.096	±0.022	ab	0.02112	0.257	±0.075	bcde	0.05654	0.478	±0.159	ab	0.10516	0.952	±0.293	abc	0.20944	0.055	± 0.025	0.0121
Kru	0.244	±0.017	ab	0.05856	1.108	±0.175	a	0.26592	1.092	±0.182	ab	0.26208	2.68	±0.348	ab	0.6432	0.147	± 0.020	0.03528
Kunnan	0.045	±0.019	b	0.01215	0.03	±0.015	e	0.0081	0.023	±0.013	b	0.00621	0.107	±0.033	c	0.02889	0.005	± 0.006	0.00135
Latex Rojo	0.147	±0.065	ab	0.03675	0.491	±0.180	abc	0.12275	0.298	±0.134	ab	0.0745	1.061	±0.422	abc	0.26525	0.051	± 0.024	0.01275
Manzano	0.023	±0.006	b	0.0069	0.006	±0.001	e	0.0018	0.04	±0.006	b	0.012	0.078	±0.012	c	0.0234	0.005	± 0.004	0.0015
OA511	0.067	±0.034	b	0.02077	0.034	±0.017	de	0.01054	0.035	±0.018	b	0.01085	0.15	±0.076	c	0.0465	0.007	± 0.009	0.00217
P. Awak	0.074	±0.019	b	0.0259	0.018	±0.004	e	0.0063	0.105	±0.007	b	0.03675	0.218	±0.028	c	0.0763	0.013	± 0.003	0.00455
P. Keilyn	0.256	±0.013	ab	0.09216	0.019	±0.004	e	0.00684	0.031	±0.004	b	0.01116	0.311	±0.020	c	0.11196	0.014	± 0.001	0.00504
P.Ceylan	0.114	±0.042	b	0.0285	0.138	±0.103	de	0.0345	0.222	±0.124	b	0.0555	0.534	±0.298	c	0.1335	0.029	± 0.012	0.00725
P.Lidi	0.182	±0.026	ab	0.05278	0.023	±0.003	e	0.00667	0.076	±0.016	b	0.02204	0.3	±0.025	c	0.087	0.015	± 0.008	0.00435
P.Liling	0.028	±0.017	ab	0.0084	0.004	±0.002	e	0.0012	0.009	±0.005	b	0.0027	0.042	±0.025	c	0.0126	0.002	± 0.008	0.0006
Pitogo	0.059	±0.012	b	0.02006	0.27	±0.028	cde	0.0918	2.001	±0.060	a	0.68034	2.661	±0.041	abc	0.90474	0.18	± 0.053	0.0612
Prata	0.198	±0.064	ab	0.04554	0.164	±0.022	de	0.03772	0.216	±0.047	b	0.04968	0.641	±0.144	c	0.14743	0.033	± 0.010	0.00759
Red Macabu	0.205	±0.035	ab	0.05535	0.108	±0.070	de	0.02916	0.147	±0.047	b	0.03969	0.514	±0.101	c	0.13878	0.025	± 0.014	0.00675
Selangor	0.267	±0.055	ab	0.06675	0.07	±0.017	de	0.0175	0.107	±0.034	b	0.02675	0.478	±0.057	c	0.1195	0.023	± 0.003	0.00575
ThapMaeo	0.128	±0.008	ab	0.0384	0.039	±0.011	de	0.0117	0.125	±0.005	b	0.0375	0.317	±0.023	c	0.0951	0.017	± 0.011	0.0051
Tindok	0.122	±0.025	b	0.04514	0.703	±0.109	ab	0.26011	1.07	±0.147	a	0.3959	2.146	±0.276	a	0.79402	0.124	± 0.007	0.04588
1-Total carotenoid count includes traces amounts of 13-cis-α-carotene and 13-cis-β-carotene (data not shown on the table)
2- Retinol activity equivalent (RAE) in mg/100g D.W.
3- Tukey’s HSD (Honest Significant Difference) grouping

## Sheet: Table A.4
Table A.5. Total carotenoid content of 27 banana accessions at ripening stage C, fully ripe in controlled conditions (Ccc).
Total carotenoid content at maturation stage Ccc (fully ripe in controlled conditions)
Name	Lutein (mg/100 g dry weight)		Tukey's HSD3	Lutein (mg/100g fresh weight)	α-carotene (mg/100 g dry weight)		Tukey's HSD3	α-carotene (mg/100g fresh weight)	β-carotene (mg/100 g dry weight)		Tukey's HSD3	β-carotene (mg/100g fresh weight)	Total Carotenoids1 (mg/100g dry weight)		Tukey's HSD3	Total Carotenoids1 (mg/100g fresh weight)	Total Carotenoids (RAE)2 (mg/100 g dry weight)		Total Carotenoids (RAE)2 (mg/100 g fresh weight)
Baby Khai	0.349	±0.051	a	0.11168	0.362	±0.079	bc	0.11584	0.52	±0.105	ab	0.1664	1.365	±0.213	abc	0.4368	0.073	± 0.019	0.02336
Bluggoe	0.106	±0.007	ab	0.03498	0.05	±0.021	c	0.0165	0.212	±0.071	b	0.06996	0.407	±0.099	bc	0.13431	0.024	± 0.009	0.00792
Bri Bri	0.11	±0.011	ab	0.0286	0.535	±0.188	abc	0.1391	0.851	±0.300	ab	0.22126	1.673	±0.532	abc	0.43498	0.098	± 0.025	0.02548
Bungai	0.107	±0.036	ab	0.03531	0.054	±0.007	c	0.01782	0.261	±0.027	b	0.08613	0.47	±0.043	bc	0.1551	0.028	± 0.007	0.00924
Cavendish	0.367	±0.029	ab	0.07707	0.141	±0.044	c	0.02961	0.123	±0.036	b	0.02583	0.667	±0.116	bc	0.14007	0.031	± 0.003	0.00651
Clon Frances	0.206	±0.003	ab	0.05768	0.052	±0.009	c	0.01456	0.089	±0.015	b	0.02492	0.373	±0.026	c	0.10444	0.018	± 0.005	0.00504
Ducasse	0.068	±0.014	ab	0.02108	0.024	±0.012	c	0.00744	0.134	±0.010	b	0.04154	0.261	±0.033	c	0.08091	0.015	± 0.003	0.00465
FHIA18	0.167	±0.021	ab	0.04008	0.063	±0.031	c	0.01512	0.11	±0.035	b	0.0264	0.374	±0.095	bc	0.08976	0.019	± 0.006	0.00456
Hua Moa	0.068	±0.002	b	0.01904	0.778	±0.026	abc	0.21784	1.389	±0.046	ab	0.38892	2.468	±0.082	abc	0.69104	0.151	± 0.032	0.04228
Jaribuaya	0.261	±0.069	ab	0.0783	0.031	±0.004	c	0.0093	0.092	±0.015	b	0.0276	0.412	±0.060	bc	0.1236	0.02	± 0.006	0.006
KKB	0.175	±0.015	ab	0.0385	0.381	±0.020	bc	0.08382	0.656	±0.023	ab	0.14432	1.352	±0.063	bc	0.29744	0.078	± 0.026	0.01716
Kru	0.263	±0.035	ab	0.06312	1.247	±0.254	ab	0.29928	1.267	±0.255	ab	0.30408	3.017	±0.561	ab	0.72408	0.169	± 0.030	0.04056
Kunnan	0.125	±0.010	ab	0.0325	0.042	±0.003	c	0.01092	0.054	±0.011	b	0.01404	0.237	±0.021	c	0.06162	0.011	± 0.003	0.00286
Latex Rojo	0.204	±0.017	ab	0.051	0.615	±0.109	bc	0.15375	0.382	±0.071	b	0.0955	1.331	±0.202	bc	0.33275	0.066	± 0.015	0.0165
Manzano	0.088	±0.018	ab	0.02728	0.03	±0.009	c	0.0093	0.071	±0.010	b	0.02201	0.208	±0.021	c	0.06448	0.011	± 0.004	0.00341
OA511	0.308	±0.056	ab	0.0924	0.128	±0.007	c	0.0384	0.154	±0.009	b	0.0462	0.64	±0.075	bc	0.192	0.031	± 0.013	0.0093
P. Awak	0.065	±0.026	ab	0.02275	0.017	±0.006	c	0.00595	0.096	±0.023	b	0.0336	0.201	±0.061	c	0.07035	0.011	± 0.003	0.00385
P. Keilyn	0.395	±0.023	ab	0.1343	0.028	±0.005	c	0.00952	0.033	±0.002	b	0.01122	0.465	±0.030	bc	0.1581	0.02	± 0.004	0.0068
P.Ceylan	0.123	±0.037	ab	0.03198	0.135	±0.093	c	0.0351	0.256	±0.103	b	0.06656	0.587	±0.265	bc	0.15262	0.032	± 0.014	0.00832
P.Lidi	0.171	±0.01	ab	0.04446	0.023	±0.003	c	0.00598	0.109	±0.019	b	0.02834	0.331	±0.027	c	0.08606	0.017	± 0.008	0.00442
P.Liling	0.233	±0.034	ab	0.06757	0.036	±0.005	c	0.01044	0.103	±0.017	b	0.02987	0.403	±0.024	c	0.11687	0.02	± 0.008	0.0058
Pitogo	0.066	±0.007	ab	0.02178	0.229	±0.021	c	0.07557	1.641	±0.286	ab	0.54153	2.236	±0.316	abc	0.73788	0.149	± 0.018	0.04917
Prata	0.326	±0.002	ab	0.07498	0.298	±0.009	c	0.06854	0.371	±0.007	b	0.08533	1.119	±0.012	abc	0.25737	0.057	± 0.012	0.01311
Red Macabu	0.26	±0.026	ab	0.0676	0.232	±0.062	bc	0.06032	0.233	±0.053	b	0.06058	0.807	±0.162	bc	0.20982	0.04	± 0.040	0.0104
Selangor	0.135	±0.019	ab	0.03645	0.052	±0.013	c	0.01404	0.088	±0.030	b	0.02376	0.305	±0.047	bc	0.08235	0.015	± 0.007	0.00405
ThapMaeo	0.143	±0.018	ab	0.0429	0.045	±0.016	c	0.0135	0.15	±0.023	b	0.045	0.368	±0.059	bc	0.1104	0.02	± 0.009	0.006
Tindok	0.125	±0.009	ab	0.045	1.953	±0.039	a	0.70308	2.794	±0.140	a	1.00584	5.29	±0.210	a	1.9044	0.319	± 0.070	0.11484
1-Total carotenoid count includes traces amounts of 13-cis-α-carotene and 13-cis-β-carotene (data not shown on the table)
2- Retinol activity equivalent (RAE) in mg/100g D.W.
3- Tukey’s HSD (Honest Significant Difference) grouping

## Sheet: Table A.5
Table A.5. Total carotenoid content of 27 banana accessions at ripening stage C, fully ripe naturally on the plant (Cnc).
Total carotenoid content at maturation stage Ccn (fully ripe on the plant)
Name	Lutein (mg/100 g dry weight)		Tukey's HSD3	Lutein (mg/100g fresh weight)	α-carotene (mg/100 g dry weight)		Tukey's HSD3	α-carotene (mg/100g fresh weight)	β-carotene (mg/100 g dry weight)		Tukey's HSD3	β-carotene (mg/100g fresh weight)	Total Carotenoids1 (mg/100g dry weight)		Tukey's HSD3	Total Carotenoids1 (mg/100g fresh weight)	Total Carotenoids (RAE)2 (mg/100 g dry weight)		Total Carotenoids (RAE)2 (mg/100 g fresh weight)
Baby Khai	0.272	±0.037	a	0.08432	0.404	±0.08	bc	0.12524	0.675	±0.148	cdef	0.20925	1.563	±0.290	bcdef	0.48453	0.084	± 0.006	0.02604
Bluggoe	0.106	±0.003	a	0.03286	0.101	±0.002	bc	0.03131	0.325	±0.014	cdef	0.10075	0.626	±0.021	cdef	0.19406	0.036	± 0.005	0.01116
Bri Bri	0.139	±0.015	a	0.03475	0.622	±0.092	abc	0.1555	0.983	±0.103	abcd	0.24575	1.976	±0.198	bcdef	0.494	0.114	± 0.024	0.0285
Bungai	0.042	±0.010	a	0.0126	0.07	±0.010	bc	0.021	0.507	±0.028	cdef	0.1521	0.749	±0.066	cdef	0.2247	0.047	± 0.007	0.0141
Cavendish	0.089	±0.017	a	0.01869	0.113	±0.007	bc	0.02373	0.093	±0.005	f	0.01953	0.324	±0.033	cdef	0.06804	0.016	± 0.004	0.00336
Clon Frances	0.087	±0.012	a	0.02262	0.041	±0.008	bc	0.01066	0.084	±0.022	ef	0.02184	0.241	±0.045	ef	0.06266	0.012	± 0.001	0.00312
Ducasse	0.094	±0.017	a	0.02914	0.043	±0.008	bc	0.01333	0.111	±0.017	def	0.03441	0.278	±0.045	f	0.08618	0.015	± 0.003	0.00465
FHIA18	0.137	±0.017	a	0.03425	0.093	±0.010	bc	0.02325	0.128	±0.015	f	0.032	0.397	±0.043	f	0.09925	0.02	± 0.001	0.005
Hua Moa	0.044	±0.002	a	0.01276	0.299	±0.013	ab	0.08671	0.553	±0.022	abc	0.16037	1.059	±0.043	abc	0.30711	0.06	± 0.031	0.0174
Jaribuaya	0.327	±0.006	a	0.10137	0.058	±0.008	bc	0.01798	0.096	±0.014	f	0.02976	0.514	±0.020	def	0.15934	0.024	± 0.003	0.00744
KKB	0.185	±0.037	a	0.0407	0.503	±0.030	bc	0.11066	1.053	±0.035	bcdef	0.23166	2.059	±0.116	bcdef	0.45298	0.116	± 0.013	0.02552
Kru	0.275	±0.054	a	0.05775	0.705	±0.099	a	0.14805	0.689	±0.079	abcde	0.14469	1.872	±0.130	ab	0.39312	0.098	± 0.027	0.02058
Kunnan	0.117	±0.048	a	0.03159	0.072	±0.009	bc	0.01944	0.057	±0.011	f	0.01539	0.274	±0.068	f	0.07398	0.013	± 0.001	0.00351
Latex Rojo	0.219	±0.043	a	0.05475	0.57	±0.121	abc	0.1425	0.357	±0.092	cdef	0.08925	1.304	±0.200	bcdef	0.326	0.063	± 0.005	0.01575
Manzano	0.248	±0.047	a	0.06944	0.057	±0.024	bc	0.01596	0.056	±0.015	f	0.01568	0.381	±0.094	f	0.10668	0.017	± 0.007	0.00476
OA511	0.265	±0.036	a	0.0795	0.25	±0.023	bc	0.075	0.238	±0.021	ef	0.0714	0.864	±0.090	cdef	0.2592	0.041	± 0.009	0.0123
P. Awak	0.117	±0.017	a	0.03627	0.065	±0.003	bc	0.02015	0.167	±0.007	def	0.05177	0.392	±0.028	f	0.12152	0.022	± 0.002	0.00682
P. Keilyn	0.29	±0.026	a	0.0928	0.012	±0.002	c	0.00384	0.016	±0.001	f	0.00512	0.321	±0.028	def	0.10272	0.014	± 0.001	0.00448
P.Ceylan	0.156	±0.032	a	0.04212	0.183	±0.023	bc	0.04941	0.307	±0.02	cdef	0.08289	0.754	±0.070	ef	0.20358	0.04	± 0.015	0.0108
P.Lidi	0.301	±0.035	a	0.09632	0.103	±0.019	bc	0.03296	0.209	±0.042	def	0.06688	0.671	±0.063	cdef	0.21472	0.034	± 0.008	0.01088
P.Liling	0.312	±0.028	a	0.0936	0.079	±0.006	bc	0.0237	0.139	±0.015	f	0.0417	0.578	±0.011	f	0.1734	0.028	± 0.008	0.0084
Pitogo	0.096	±0.011	a	0.03072	0.157	±0.010	bc	0.05024	0.904	±0.065	ab	0.28928	1.387	±0.092	bcdef	0.44384	0.086	± 0.025	0.02752
Prata	0.341	±0.090	a	0.08184	0.202	±0.040	bc	0.04848	0.237	±0.047	cdef	0.05688	0.862	±0.199	cdef	0.20688	0.042	± 0.013	0.01008
Red Macabu	0.201	±0.030	a	0.04623	0.478	±0.172	bc	0.10994	0.606	±0.233	cdef	0.13938	1.442	±0.476	cdef	0.33166	0.079	± 0.011	0.01817
Selangor	0.193	±0.090	a	0.05018	0.086	±0.019	bc	0.02236	0.077	±0.016	f	0.02002	0.386	±0.133	cdef	0.10036	0.018	± 0.005	0.00468
ThapMaeo	0.154	±0.019	a	0.03696	0.156	±0.02	bc	0.03744	0.267	±0.028	def	0.06408	0.678	±0.081	f	0.16272	0.035	± 0.005	0.0084
Tindok	0.158	±0.034	a	0.05688	0.869	±0.161	a	0.31284	1.175	±0.137	a	0.423	2.542	±0.320	a	0.91512	0.141	± 0.072	0.05076
1-Total carotenoid count includes traces amounts of 13-cis-α-carotene and 13-cis-β-carotene (data not shown on the table)
2- Retinol activity equivalent (RAE) in mg/100g D.W.
3- Tukey’s HSD (Honest Significant Difference) grouping

## Sheet: Table A.6
Table A.6. Total carotenoid content differences (mg/100g DW) of 27 banana accessions from ripening stage A to fully ripe in controlled conditions (Ccc), and from ripening stage A to fully ripe naturally on the plant (Cnc).
Name	Average difference in Tcc from Stage A to Ccc	Ratio	Average difference in Tcc from Stage A to Ccn	Ratio
Baby Khai	0.2	1.17	0.4	1.34
Bluggoe	0.07	1.21	0.29	1.86
Bri Bri	0.43	1.35	0.74*	1.59
Bungai	-0.03	0.94	0.25	1.5
Cavendish	0.45*	3.03	0.1	1.47
Clon Frances	0.27*	3.73	0.14	2.41
Ducasse	0.16*	2.64	0.18*	2.81
FHIA18	0.3	5.34	0.33*	5.67
Hua Moa	1.44*	2.4	0.03	1.03
Jaribuaya	0.23*	2.26	0.33*	2.82
KKB	0.64*	1.89	1.34*	2.88
Kru	1.55	2.06	0.41	1.28
Kunnan	0.19*	5.51	0.23*	6.37
Latex Rojo	0.91*	3.15	0.88*	3.09
Manzano	0.19*	11.56	0.36	21.17
OA511	0.6	15.24	0.82	20.57
P. Awak	-0.01	0.97	0.19*	1.89
P. Keilyn	0.02	1.05	-0.12	0.72
P.Ceylan	0.49	5.75	0.65*	7.39
P.Lidi	0.28*	5.91	0.62*	11.98
P.Liling	0.37*	10.89	0.54*	15.62
Pitogo	1.55*	3.25	0.7	2.01
Prata	0.87*	4.57	0.62	3.52
Red Macabu	0.68*	6.46	1.32	11.54
Selangor	0.08	1.34	0.16	1.7
ThapMaeo	0.28*	4	0.59*	7.37
Tindok	3.79*	3.53	1.05	1.7
*Paired T-test (p<0.05)
