# Supplementary figures and images for: Genotype and ripening method affect carotenoid content and bio-accessibility in banana
Source: Royal Society of Chemistry journal article supplement (doi:10.1039/d3fo04632j), 2024-01-01

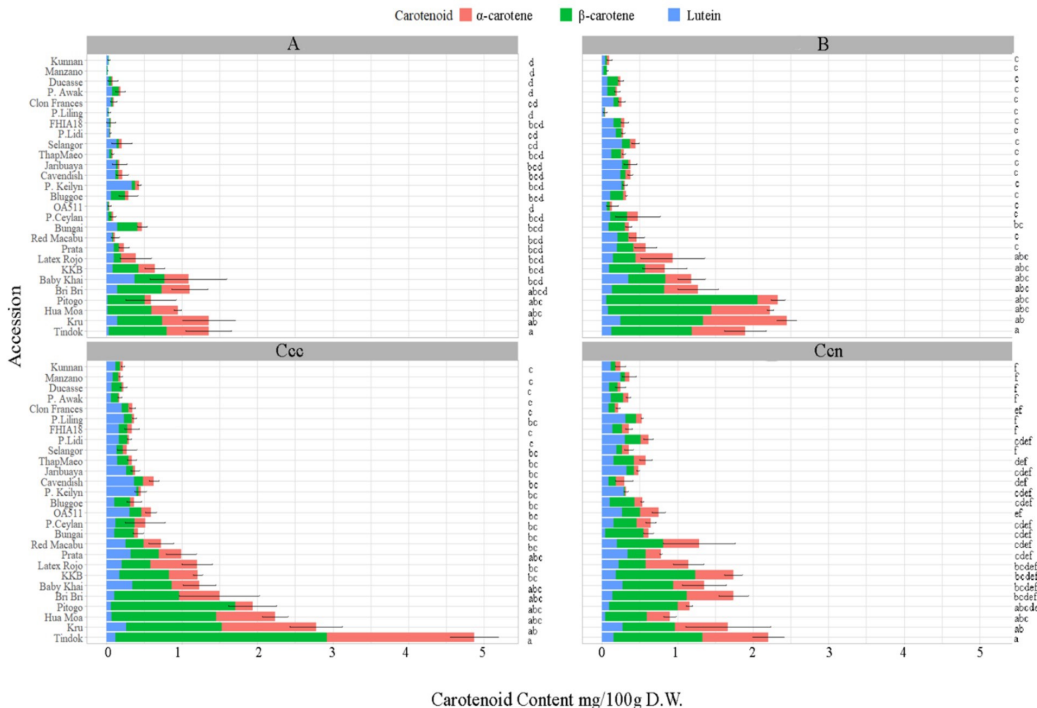

Supplement: d3fo04632j2.pdf [file d3fo04632j2.pdf]

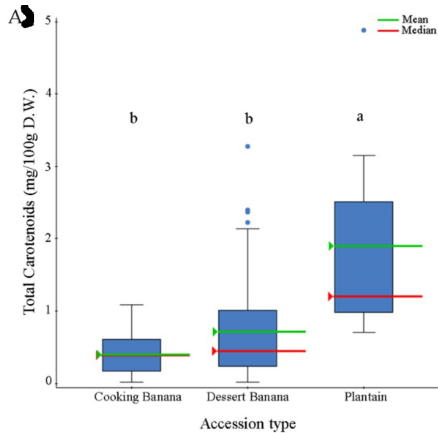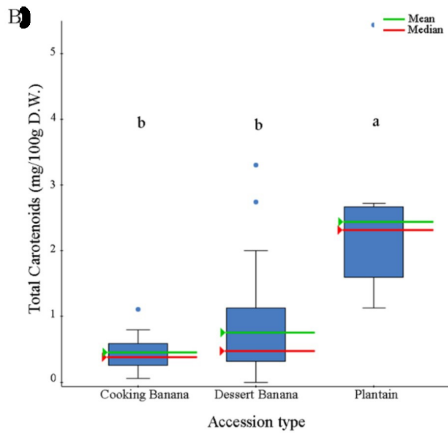

Supplement: d3fo04632j3.pdf [file d3fo04632j3.pdf]

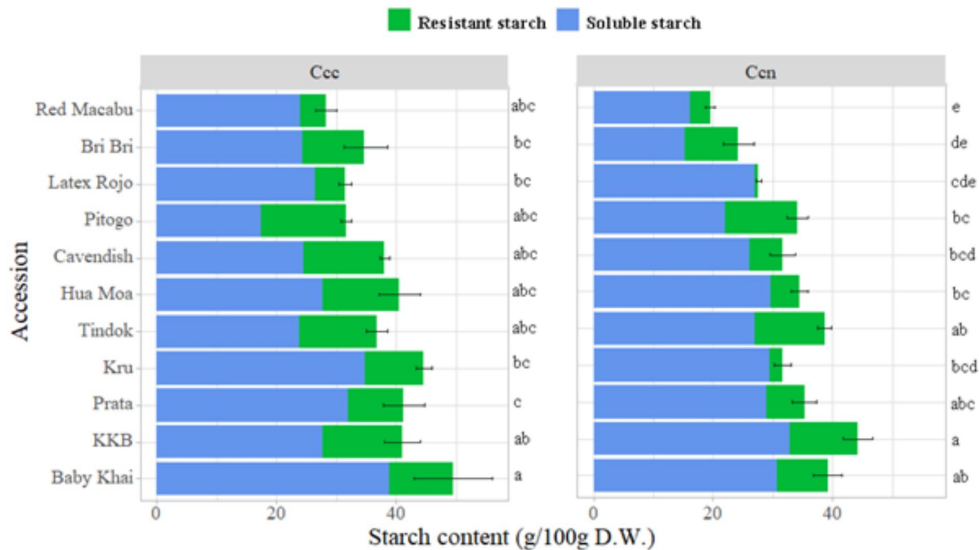

Supplement: d3fo04632j4.pdf [file d3fo04632j4.pdf]

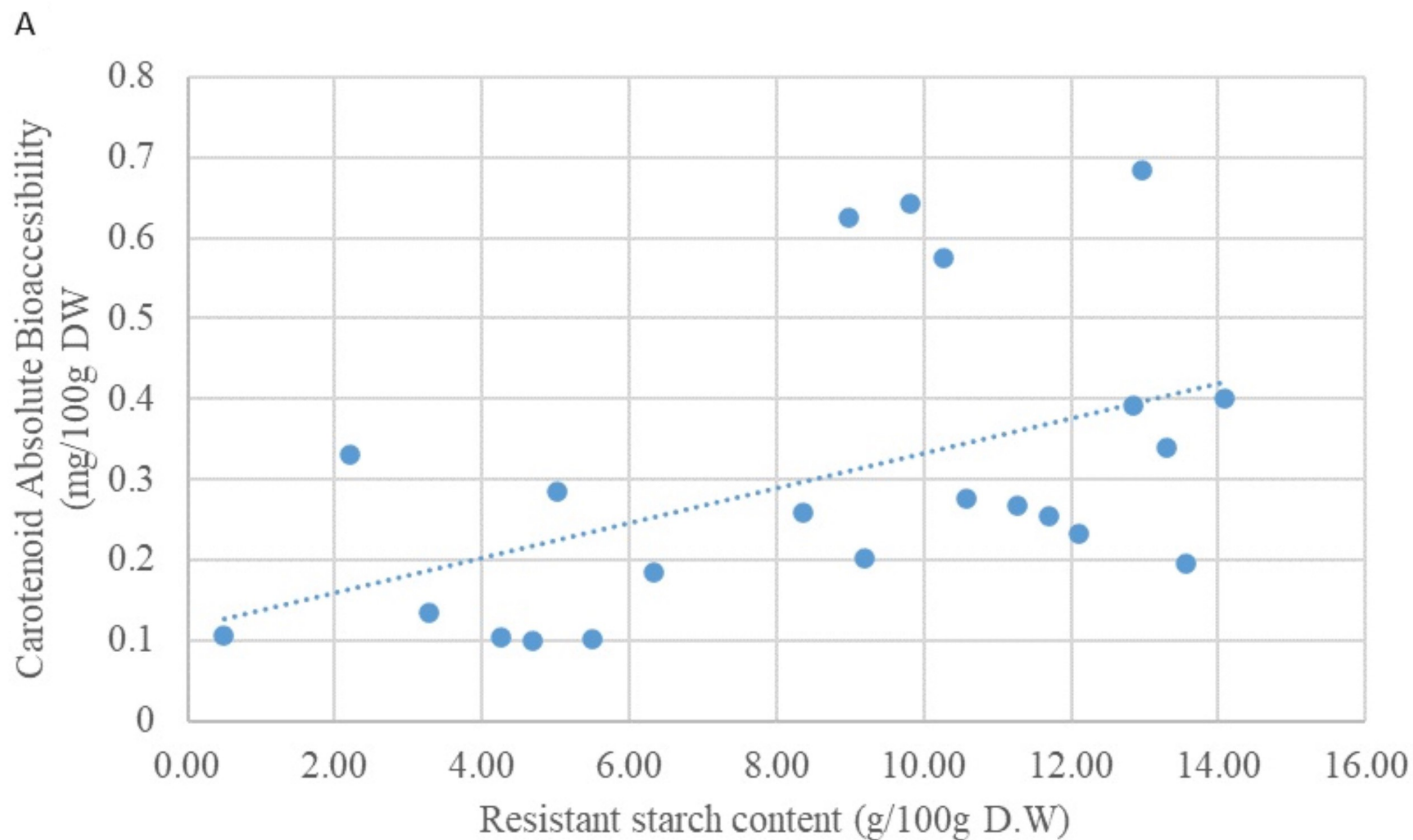

Supplement: d3fo04632j5.pdf [file d3fo04632j5.pdf]

B

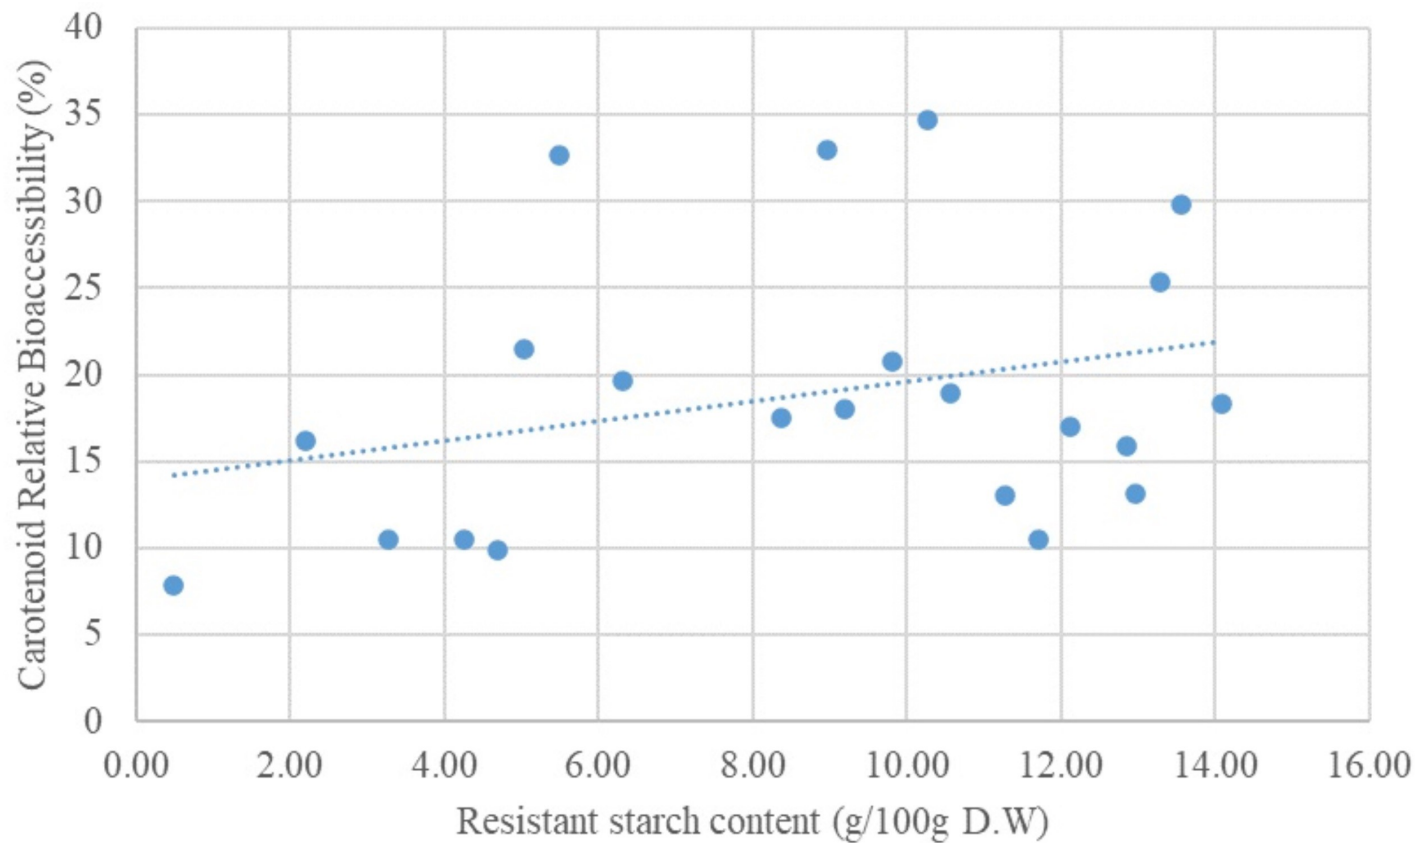

Supplement: d3fo04632j6.pdf [file d3fo04632j6.pdf]
